# Supplementary material for: Study of the electron-doping mechanism in single-walled carbon nanotubes using dimethylbenzimidazole
Source: Royal Society of Chemistry journal article supplement (doi:10.1039/d3fd00128h), 2023-07-10
Supplement: d3fd00128h1.pdf [file d3fd00128h1.pdf]

## Supporting information

*for*

### **Study of electron doping mechanism in single-walled carbon nanotubes using dimethylbenzimidazole**

*Naoki Tanaka, Itsuki Yamaguchi, and Tsuyohiko Fujigaya*

#### **Corresponding Author**

Tsuyohiko Fujigaya: [fujigaya.tsuyohiko.948@m.kyushu-u.ac.jp](mailto:fujigaya.tsuyohiko.948@m.kyushu-u.ac.jp)

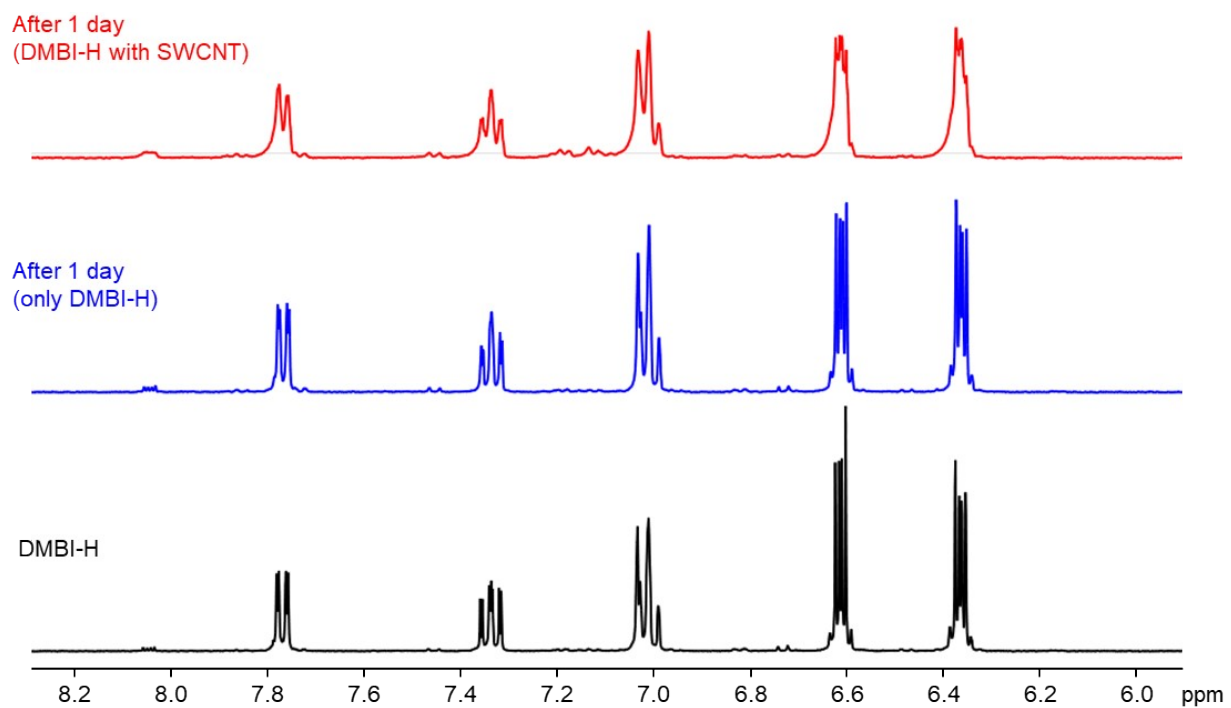

**Fig. S1** <sup>1</sup>H NMR spectra in EtOH-*d*<sub>5</sub> of residual solvent after SWCNT doping with DMBI-H for 24 hours (red line) under a nitrogen atmosphere, a solution of DMBI-H after 24 hours (blue line), and a solution of DMBI-H (black line).

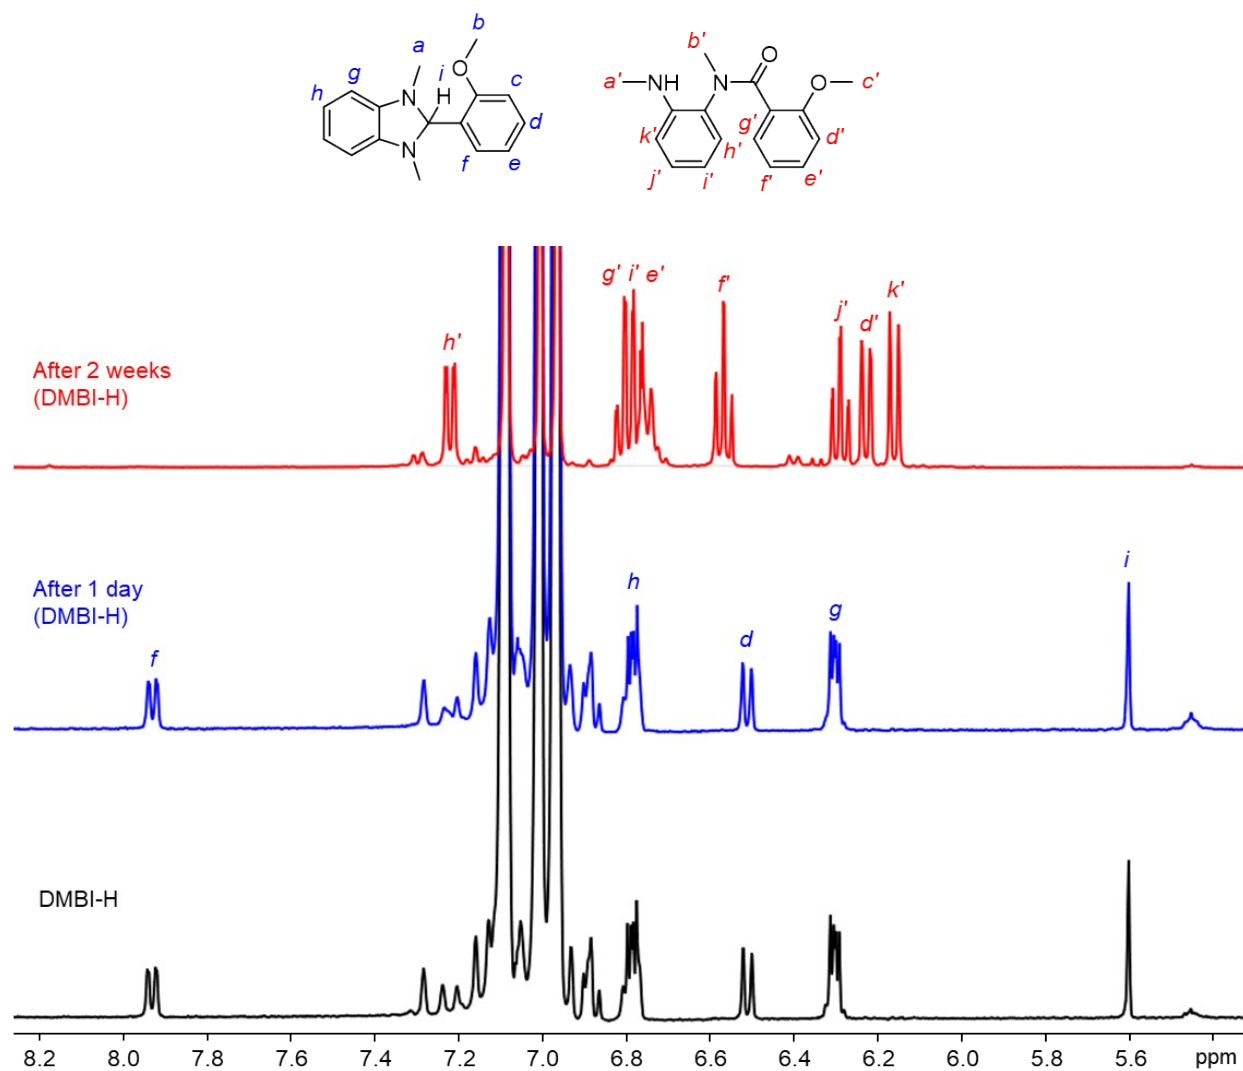

**Fig. S2** <sup>1</sup>H NMR spectra in toluene-*d*<sub>8</sub> solution of DMBI-H after two weeks (red line), 24 hours (blue line). The black line is the toluene-*d*<sub>8</sub> solution of DMBI-H immediately after preparation.
